# Supplementary material for: A novel benzimidazole derivative binds to the DNA minor groove and induces apoptosis in leukemic cells
Source: Royal Society of Chemistry journal article supplement (doi:10.1039/c5ra16605e), 2015-01-01
Supplement: c5ra16605e1.pdf [file c5ra16605e1.pdf]

# $^1\text{H}$ NMR and $^{13}\text{C}$ NMR spectra of compounds MH1-MH5

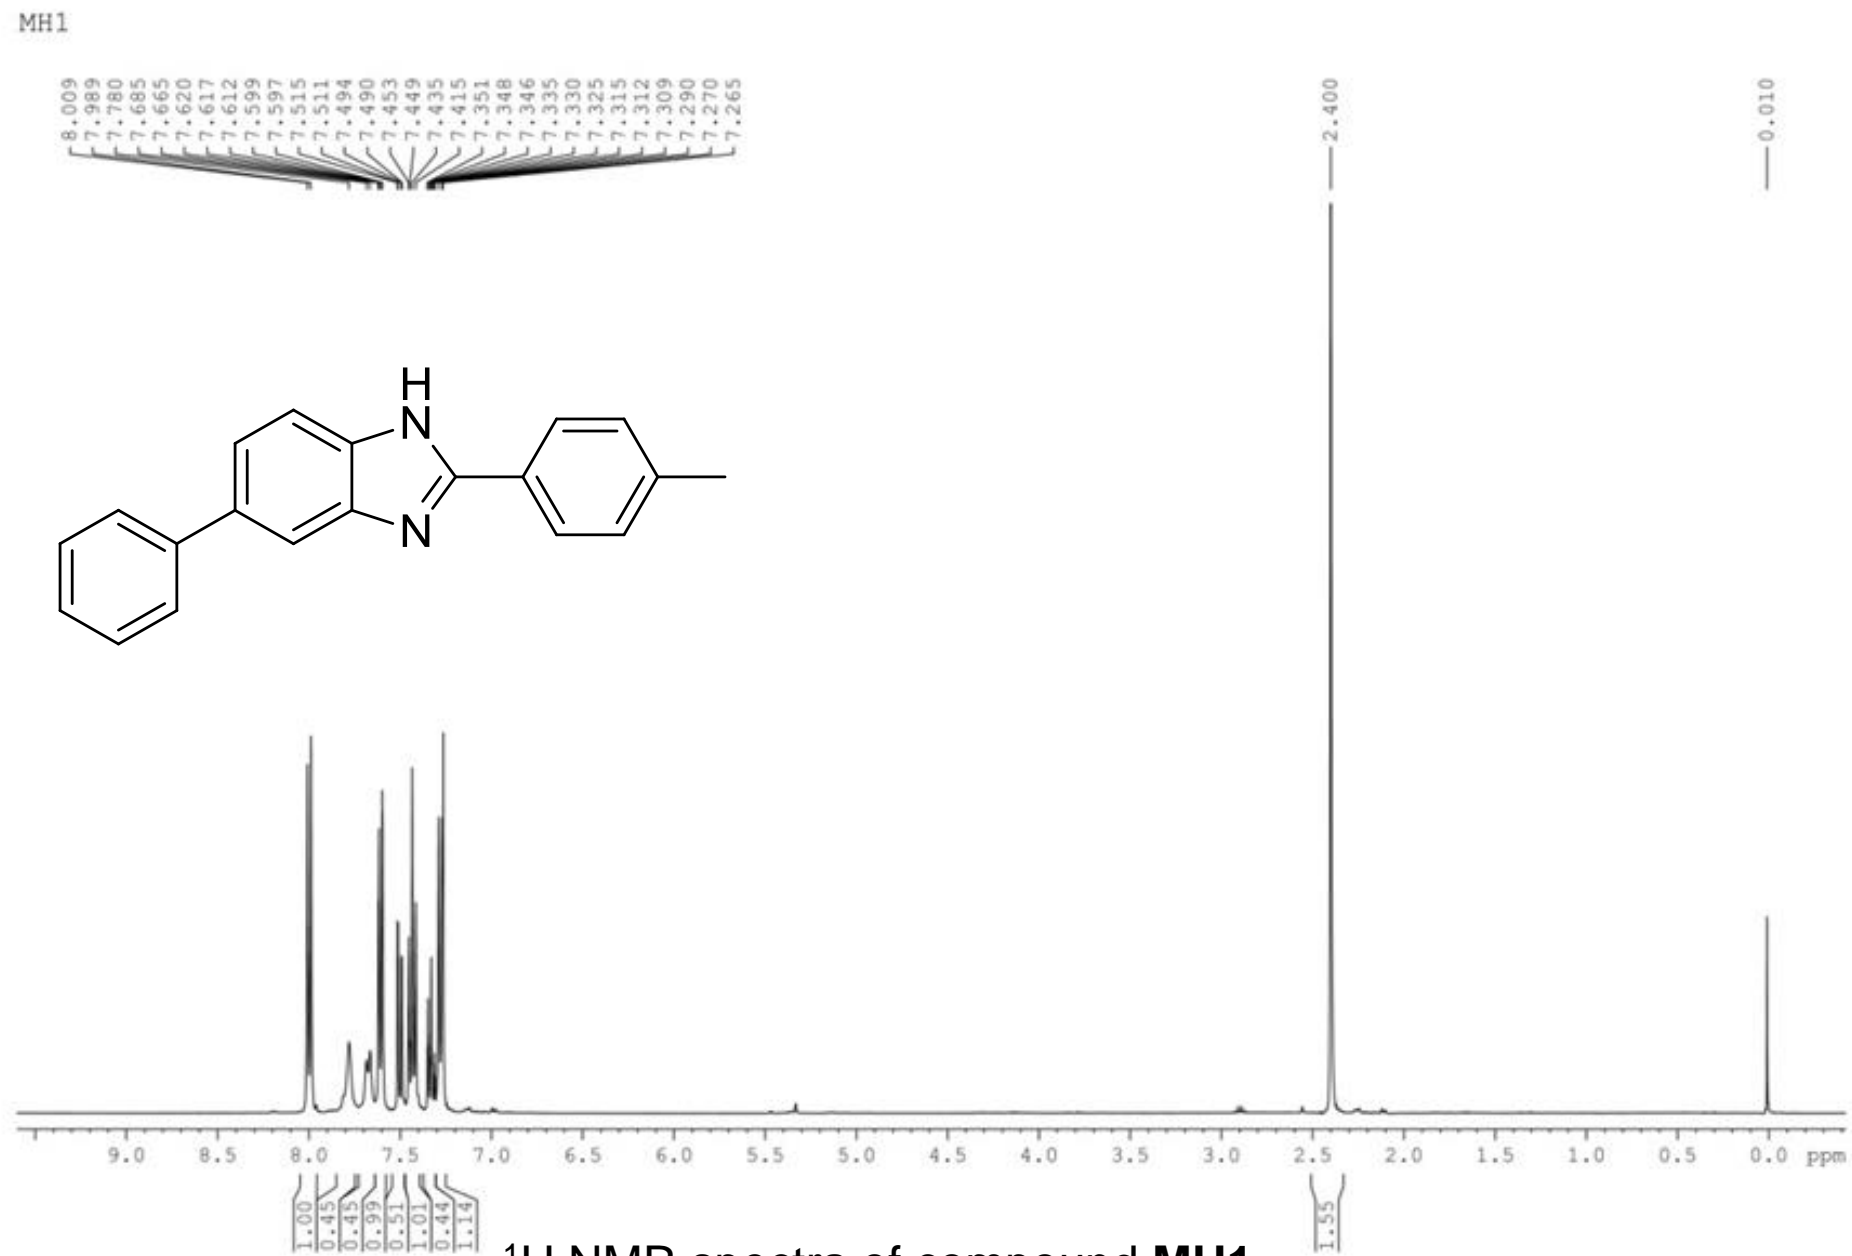

$^1\text{H}$  NMR spectra of compound **MH1**

MH1

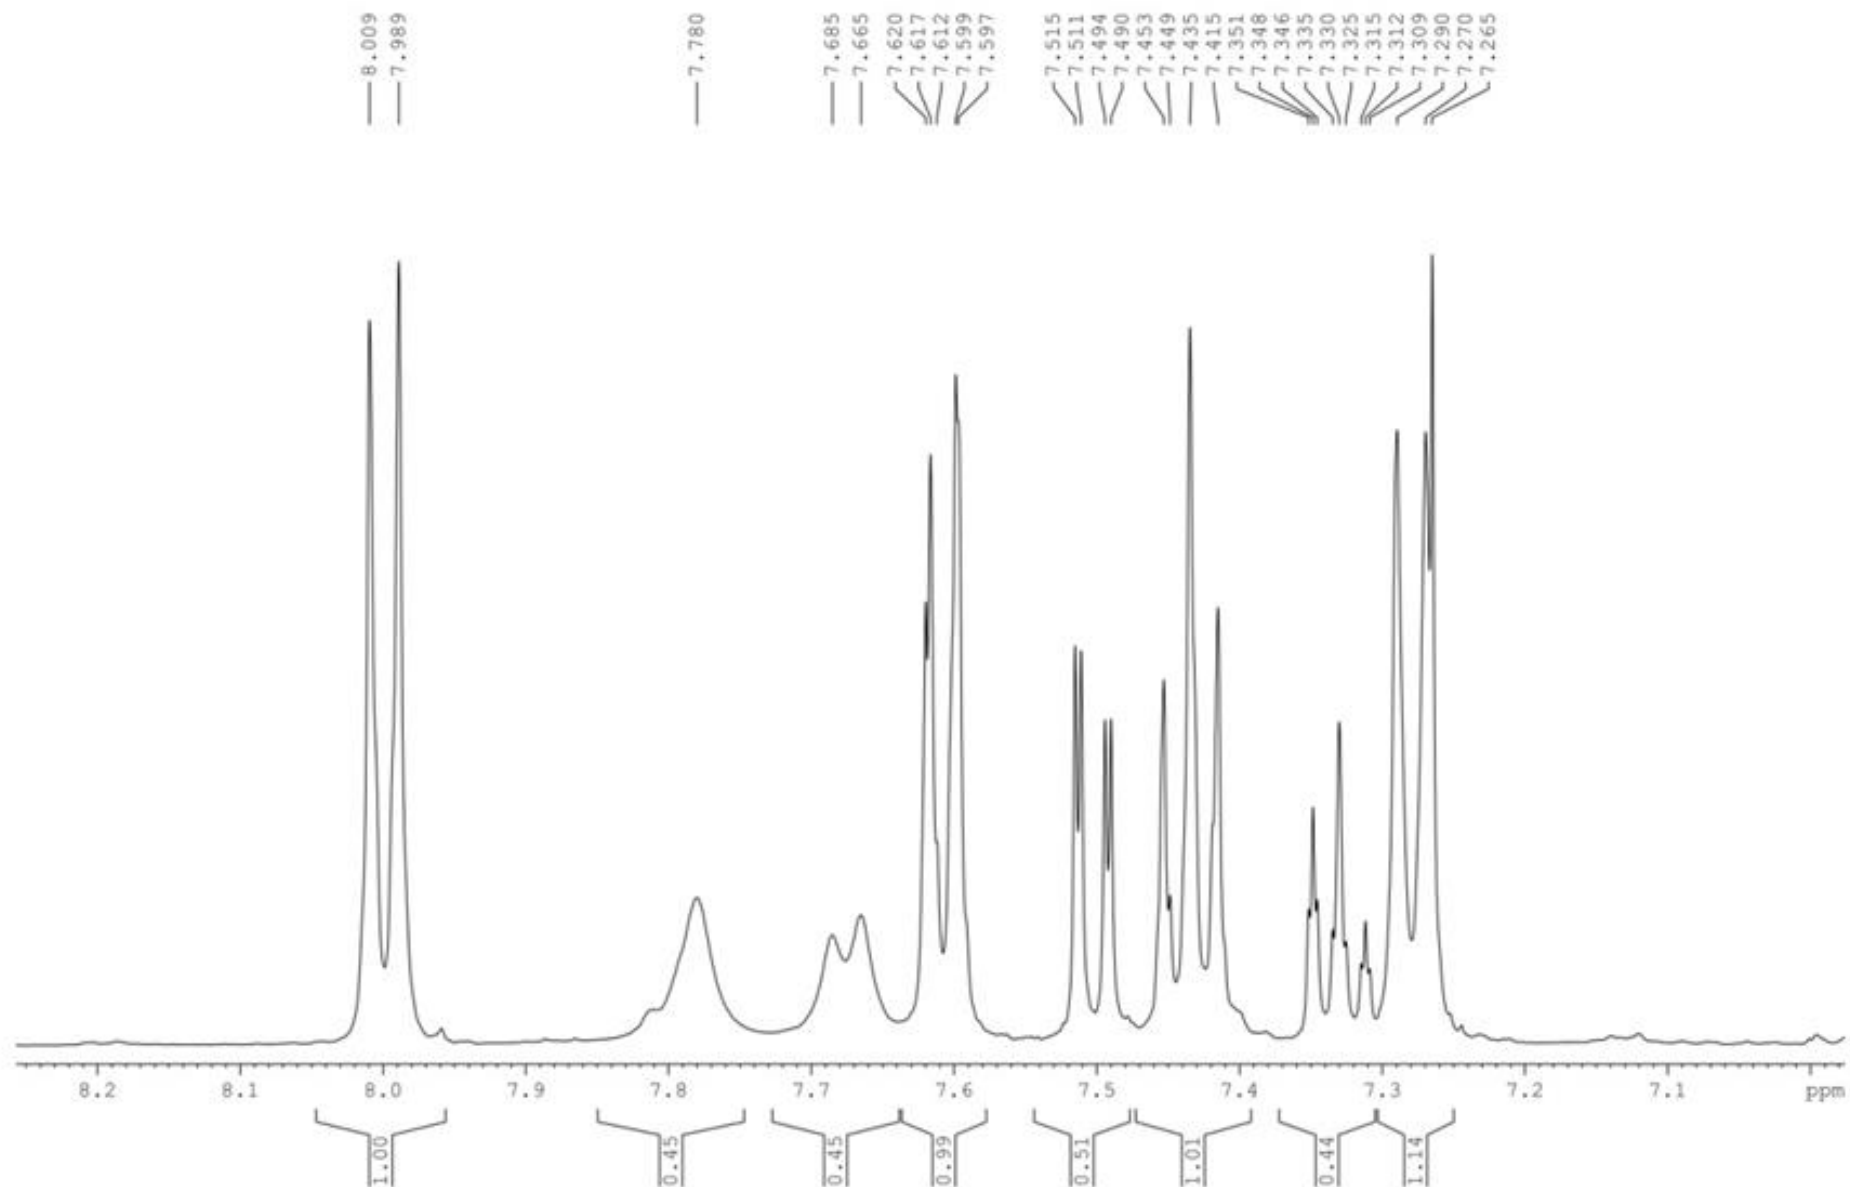

<sup>1</sup>H NMR spectra of compound **MH1** extended

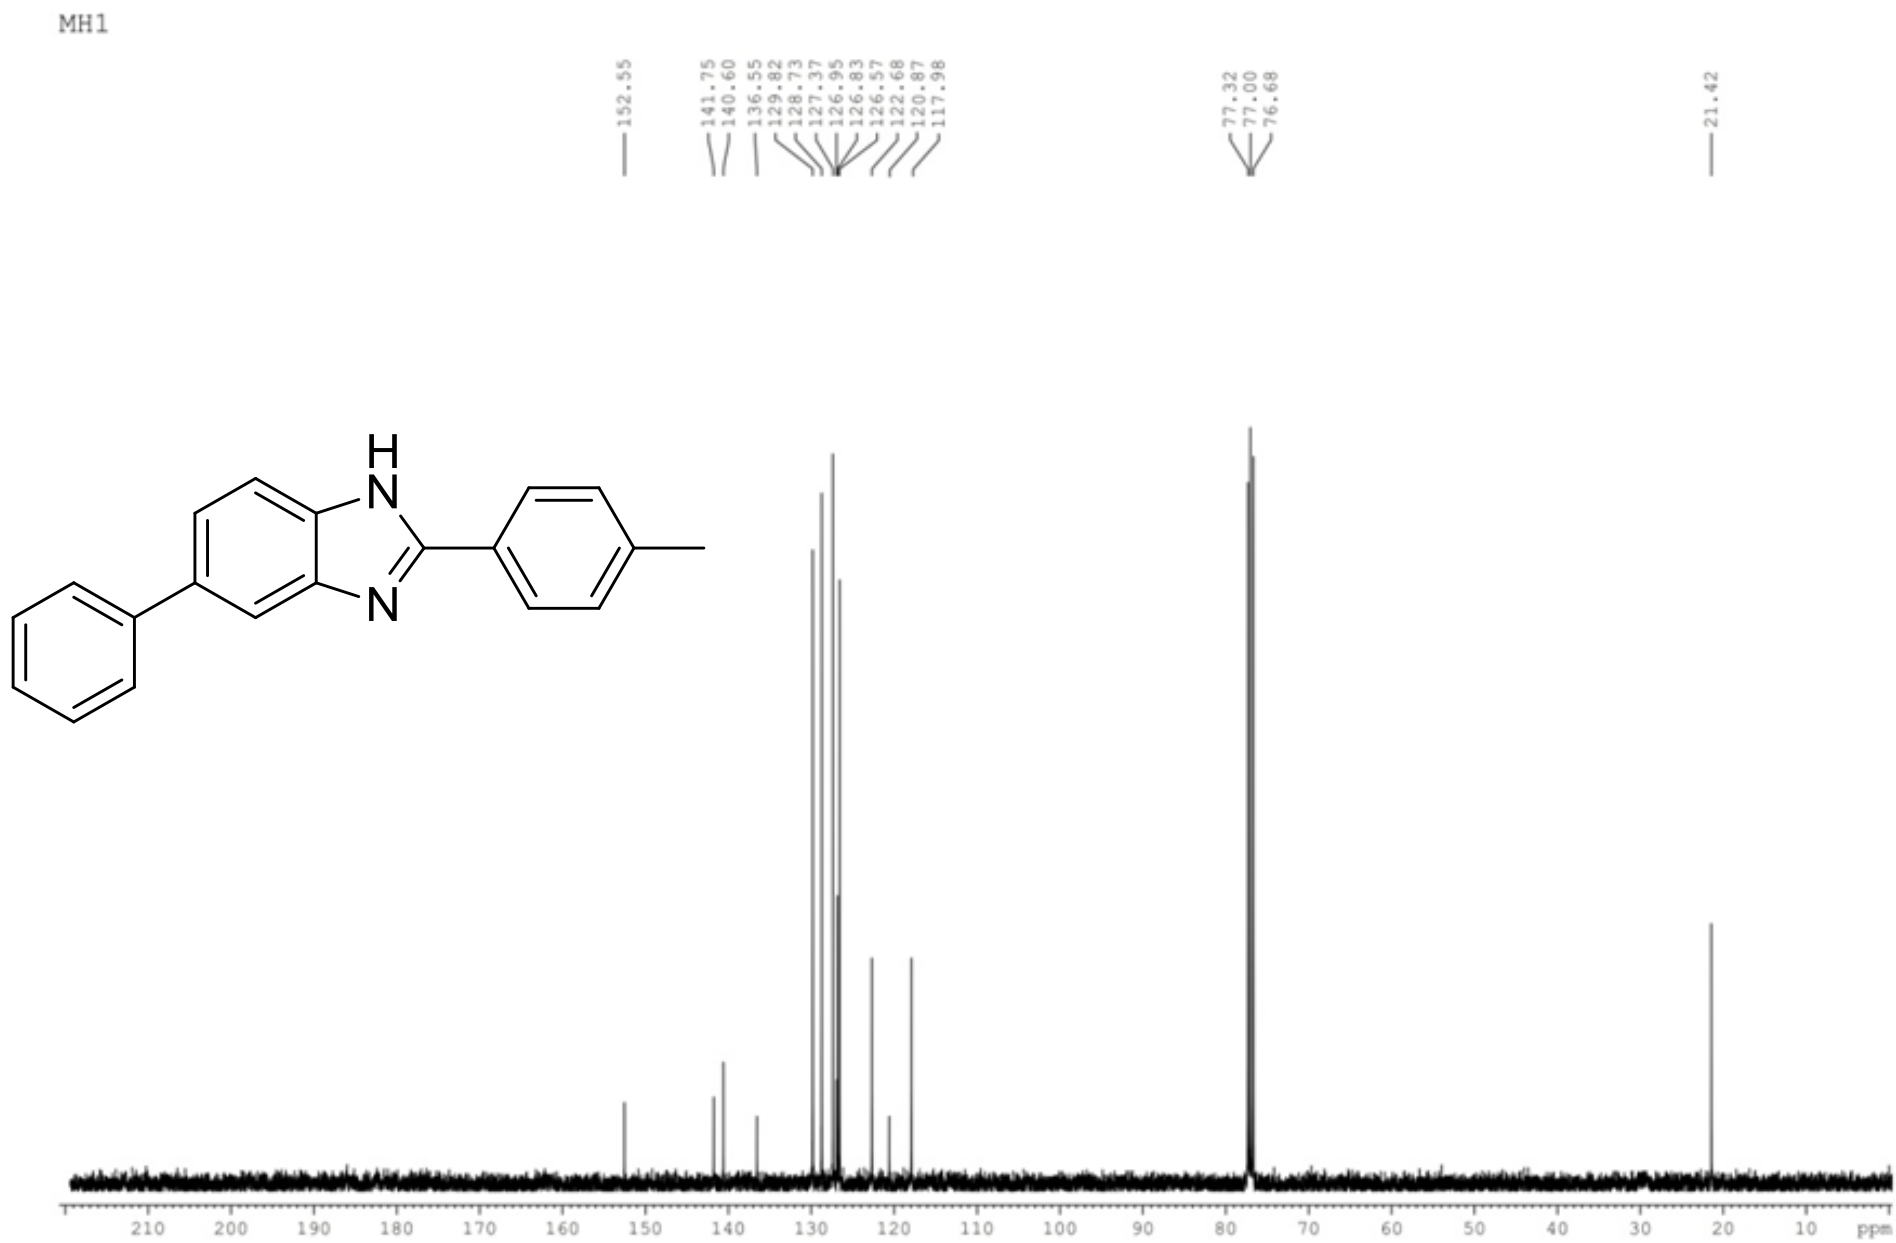

$^{13}\text{C}$  NMR Spectrum of compound **MH1**

MH2

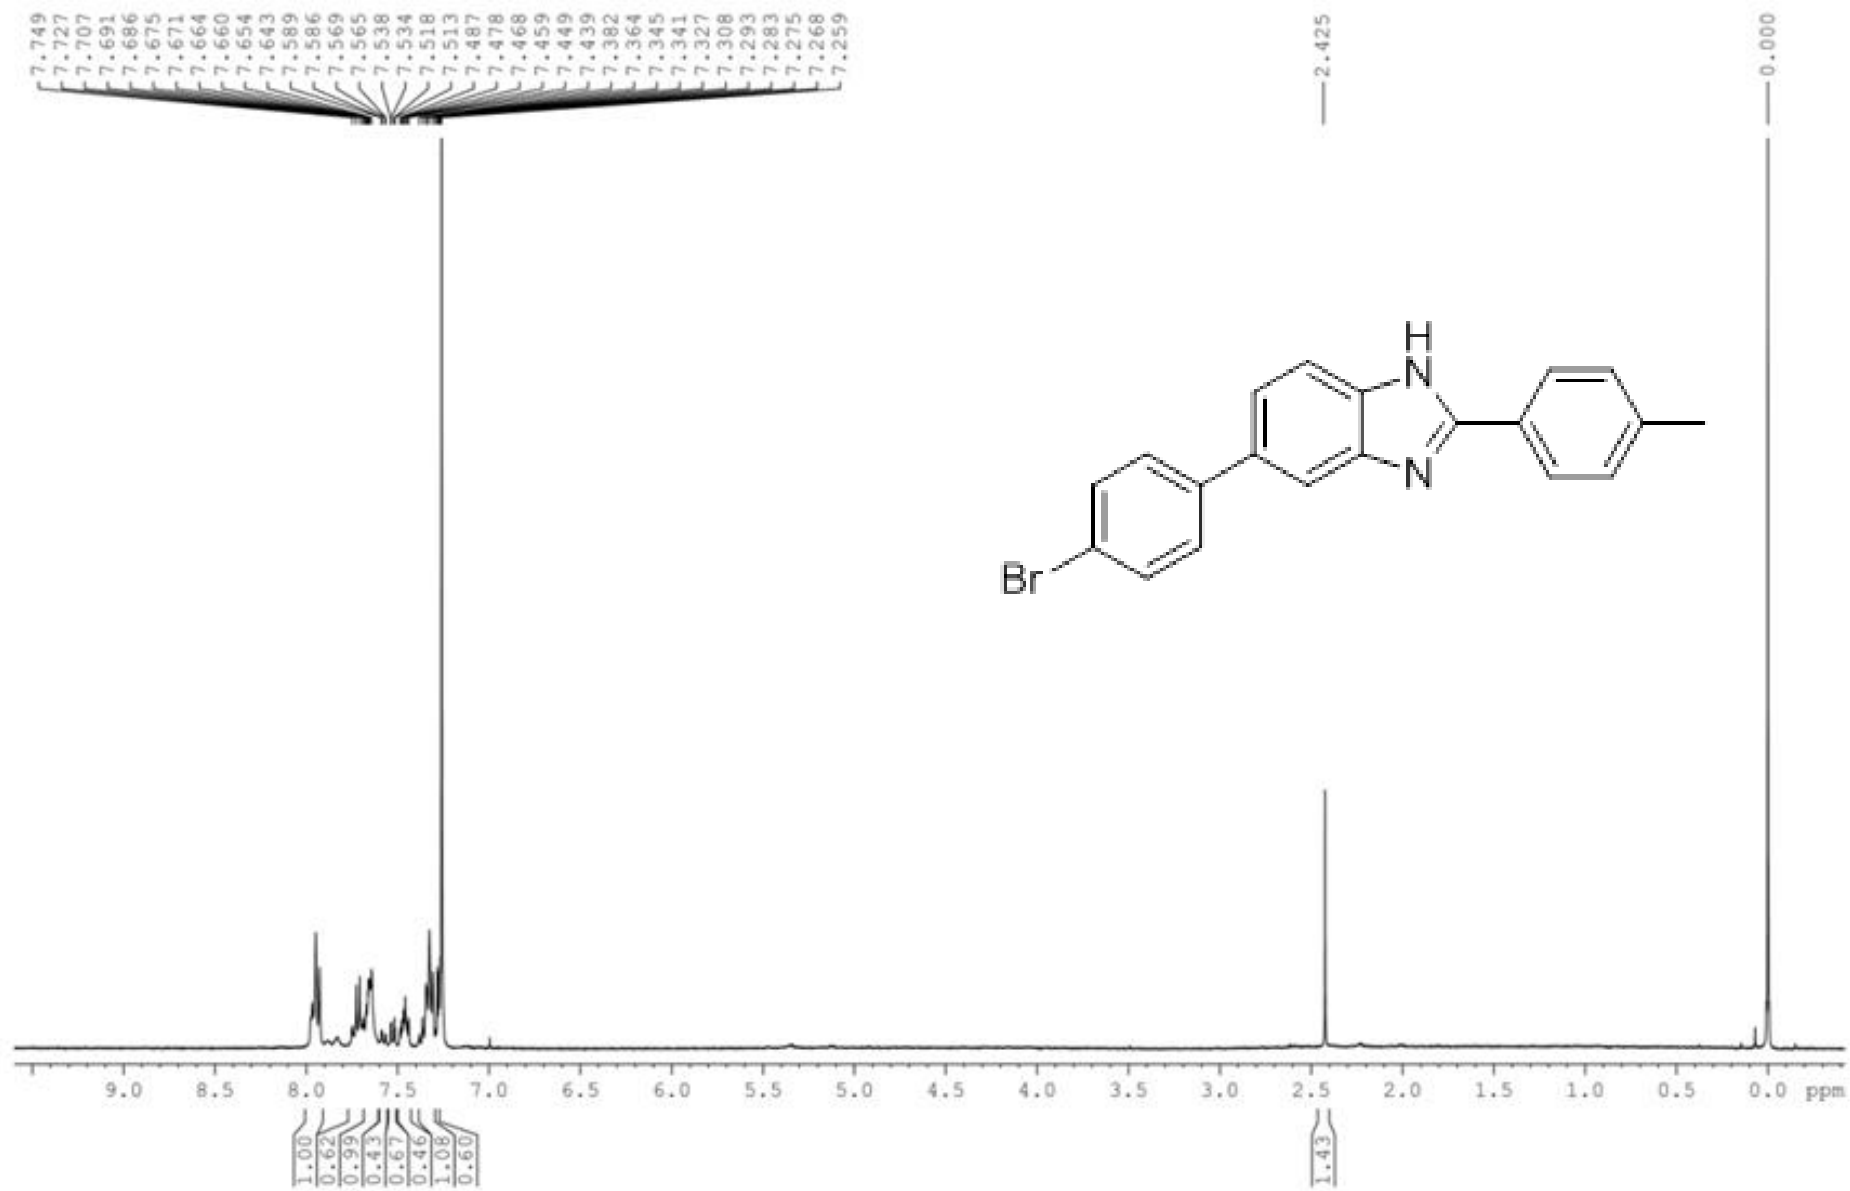

<sup>1</sup>H NMR spectra of compound **MH2**

MH2

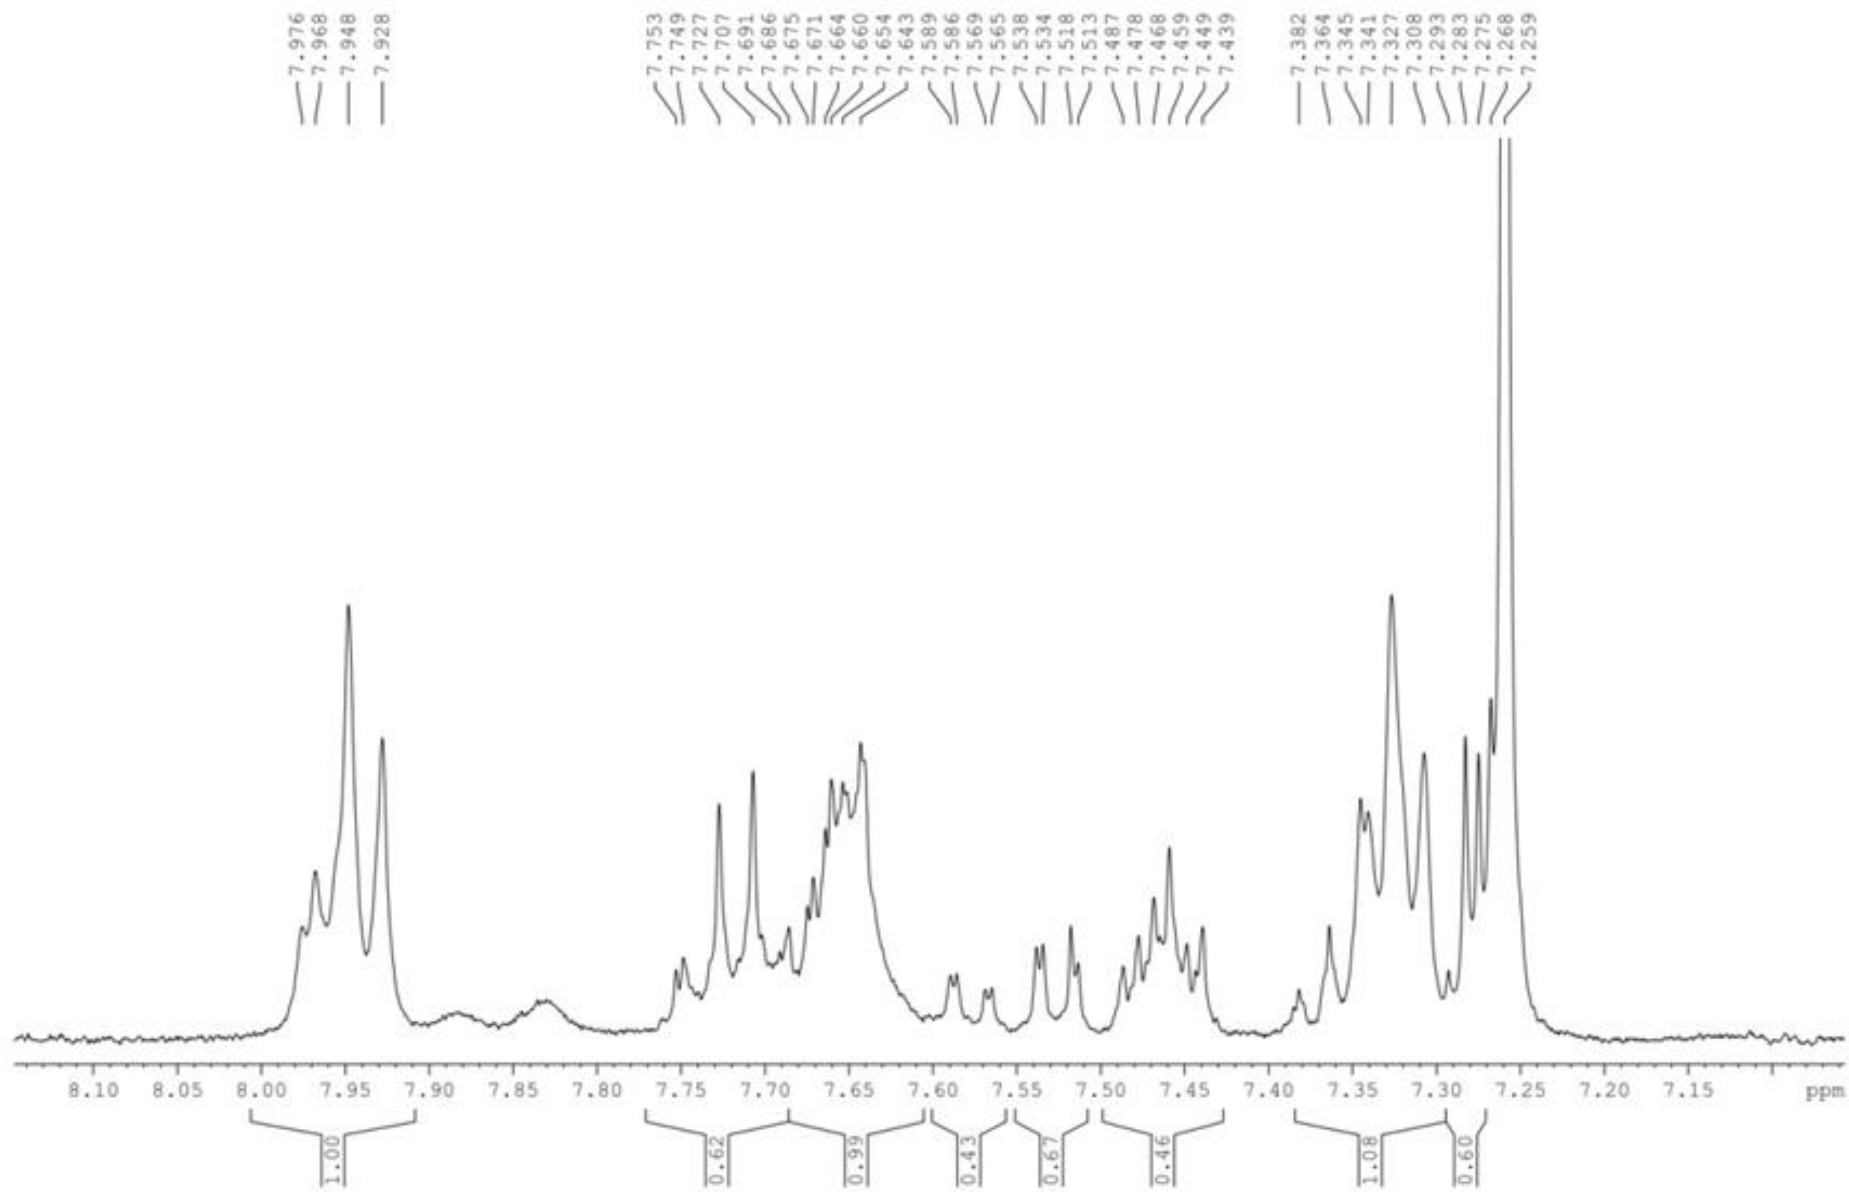

$^1\text{H}$  NMR spectra of compound **MH2** extended

MH3

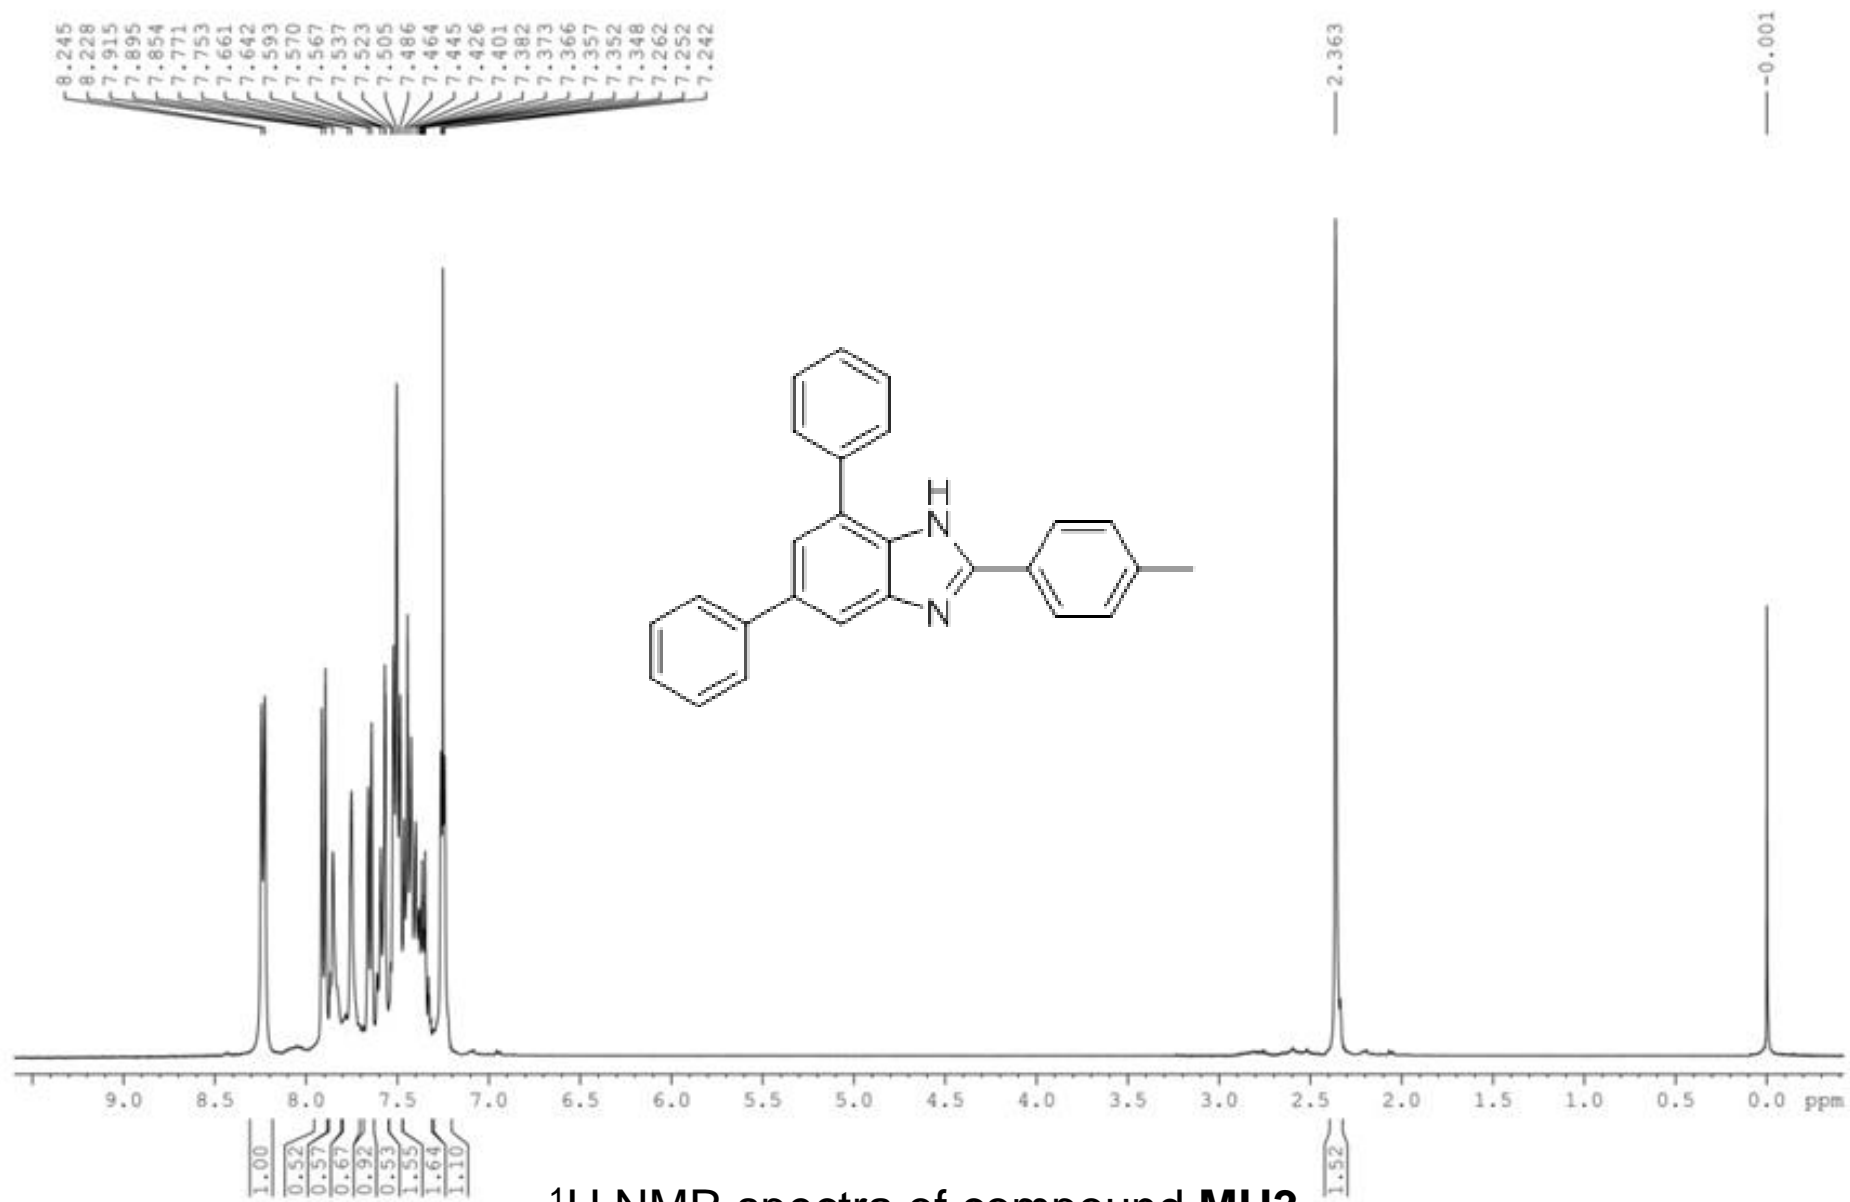

<sup>1</sup>H NMR spectra of compound **MH3**

MH3

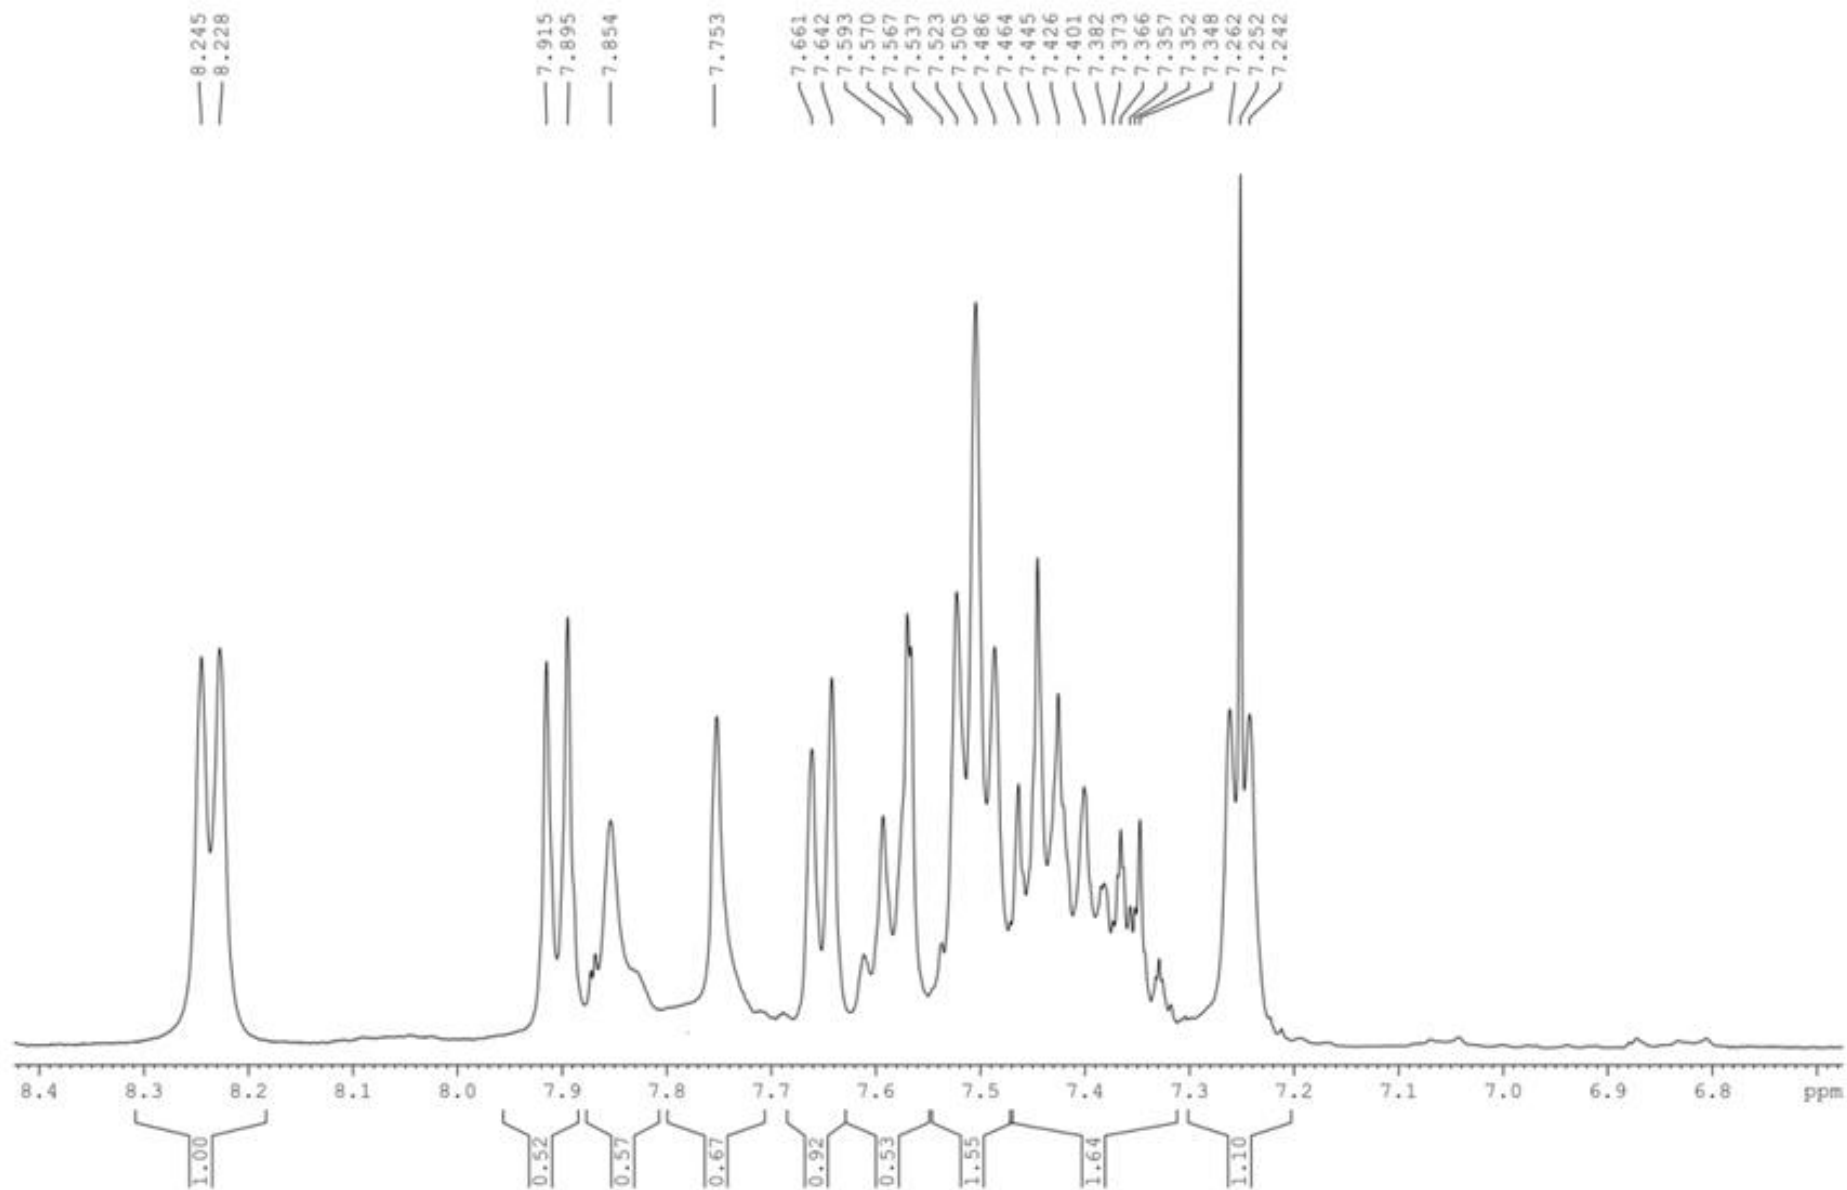

$^1\text{H}$  NMR spectra of compound **MH3** extended

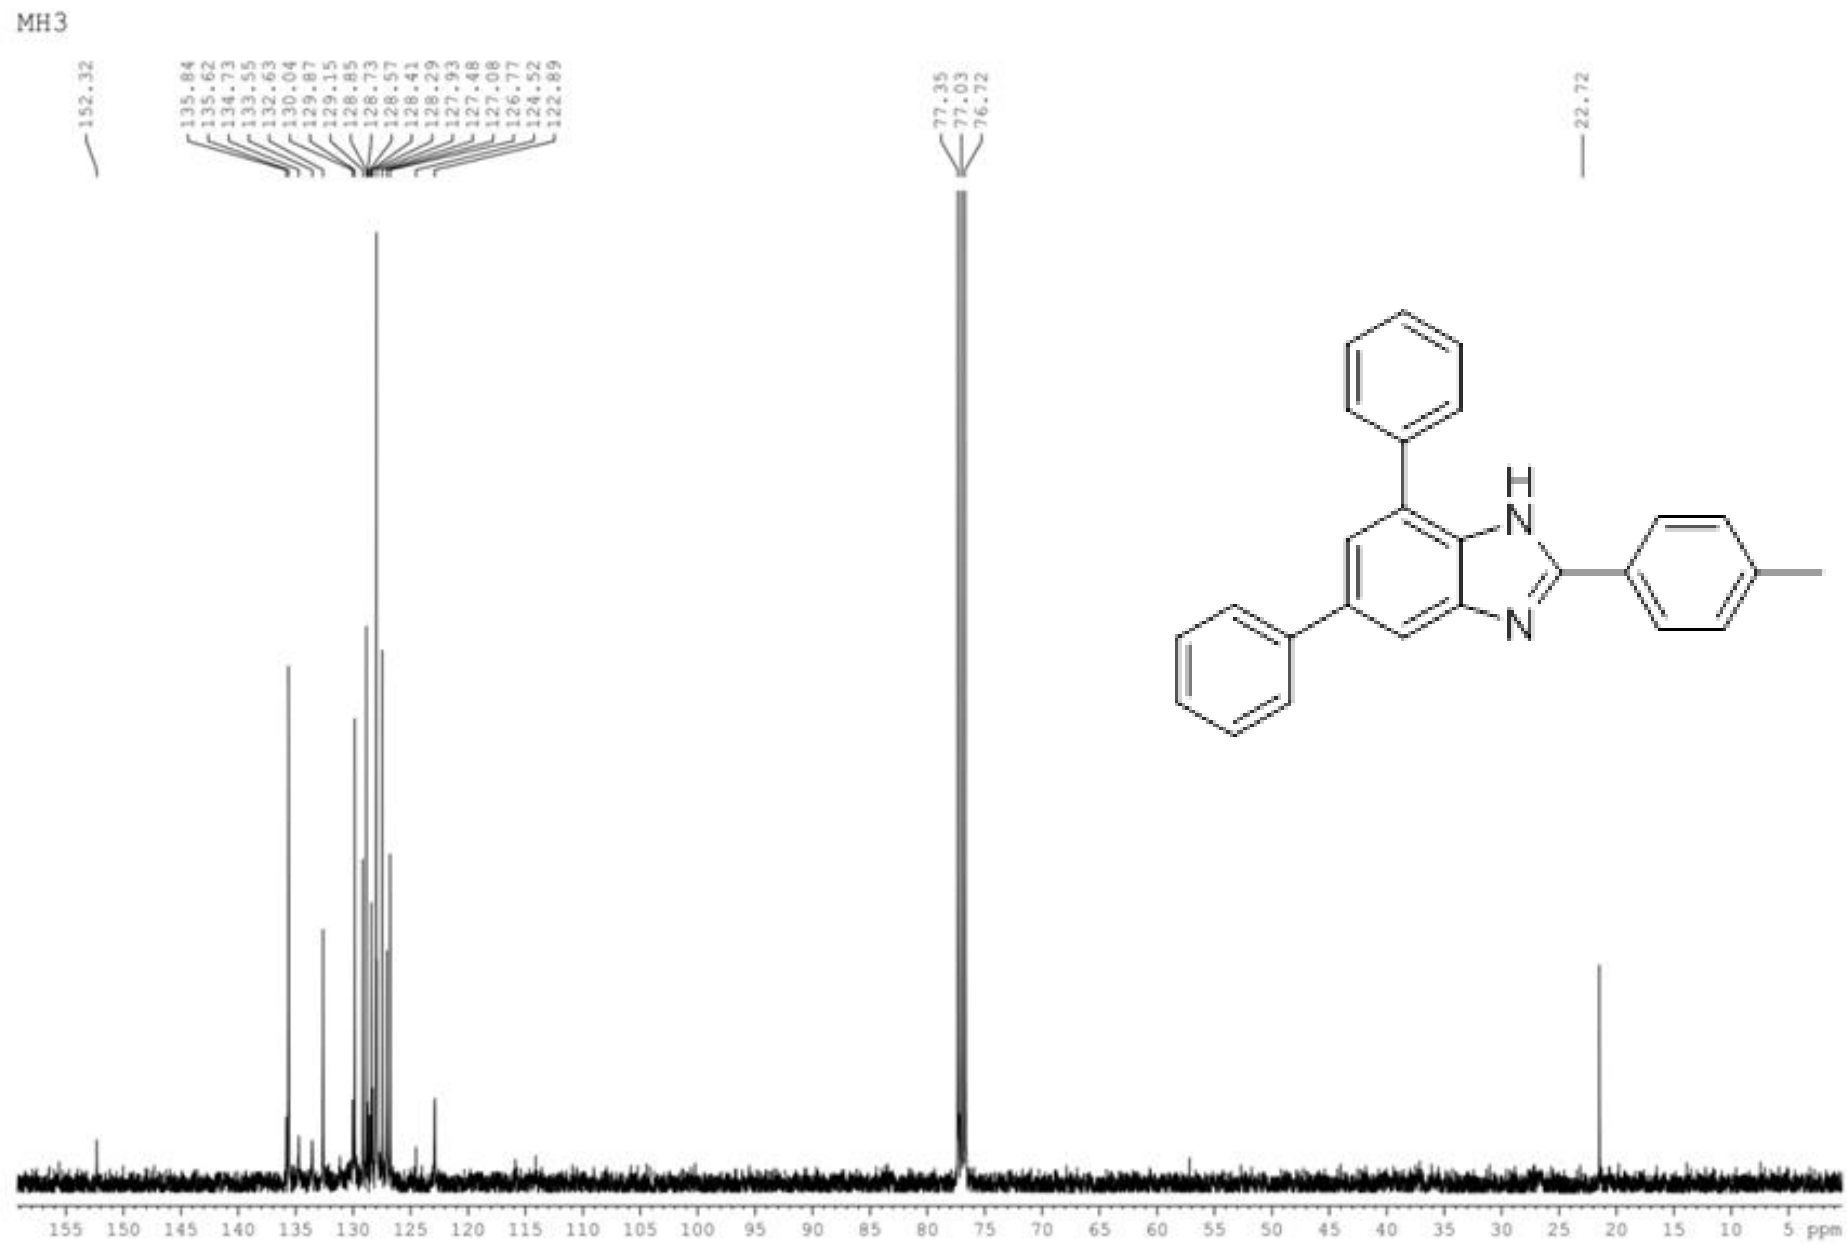

$^{13}\text{C}$  NMR Spectrum of compound **MH3**



MH4

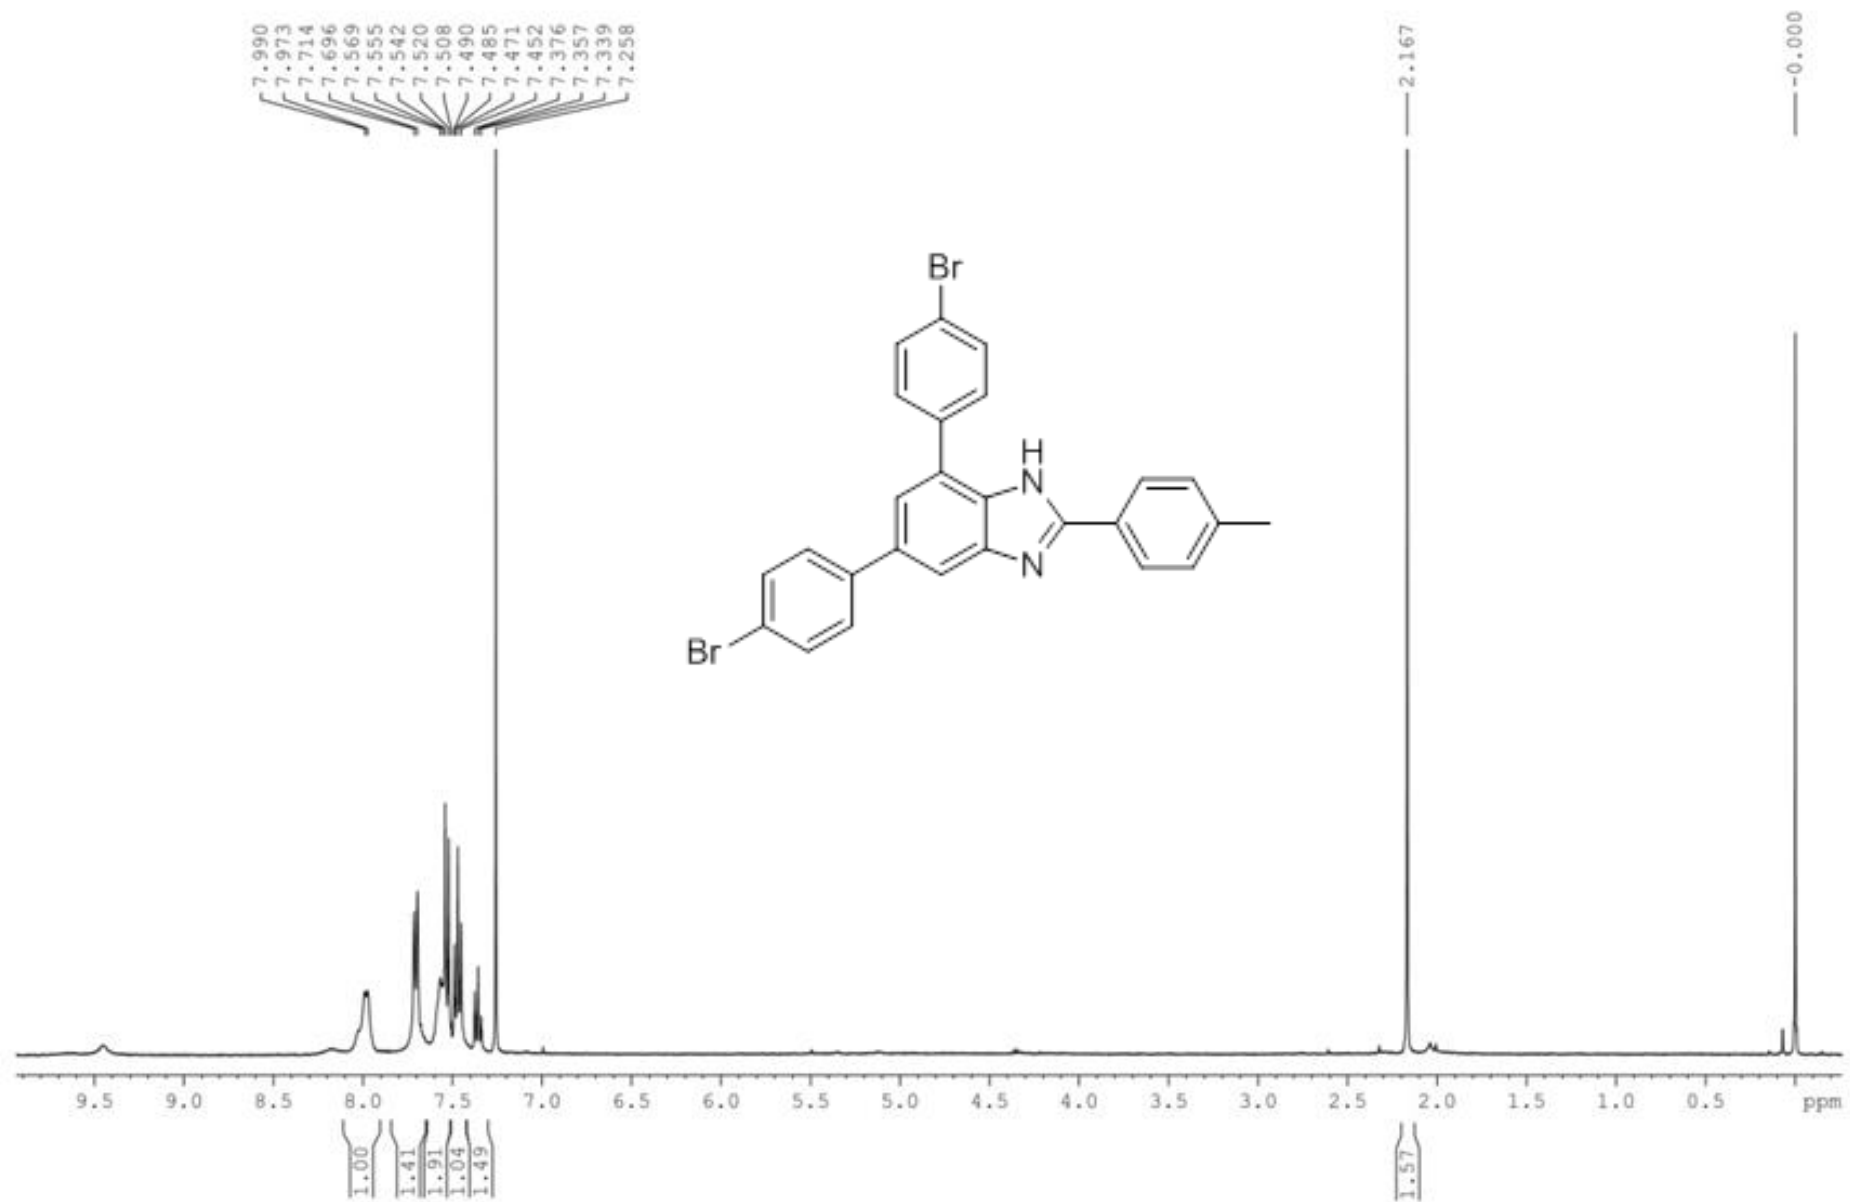

<sup>1</sup>H NMR spectra of compound **MH4**

MH4

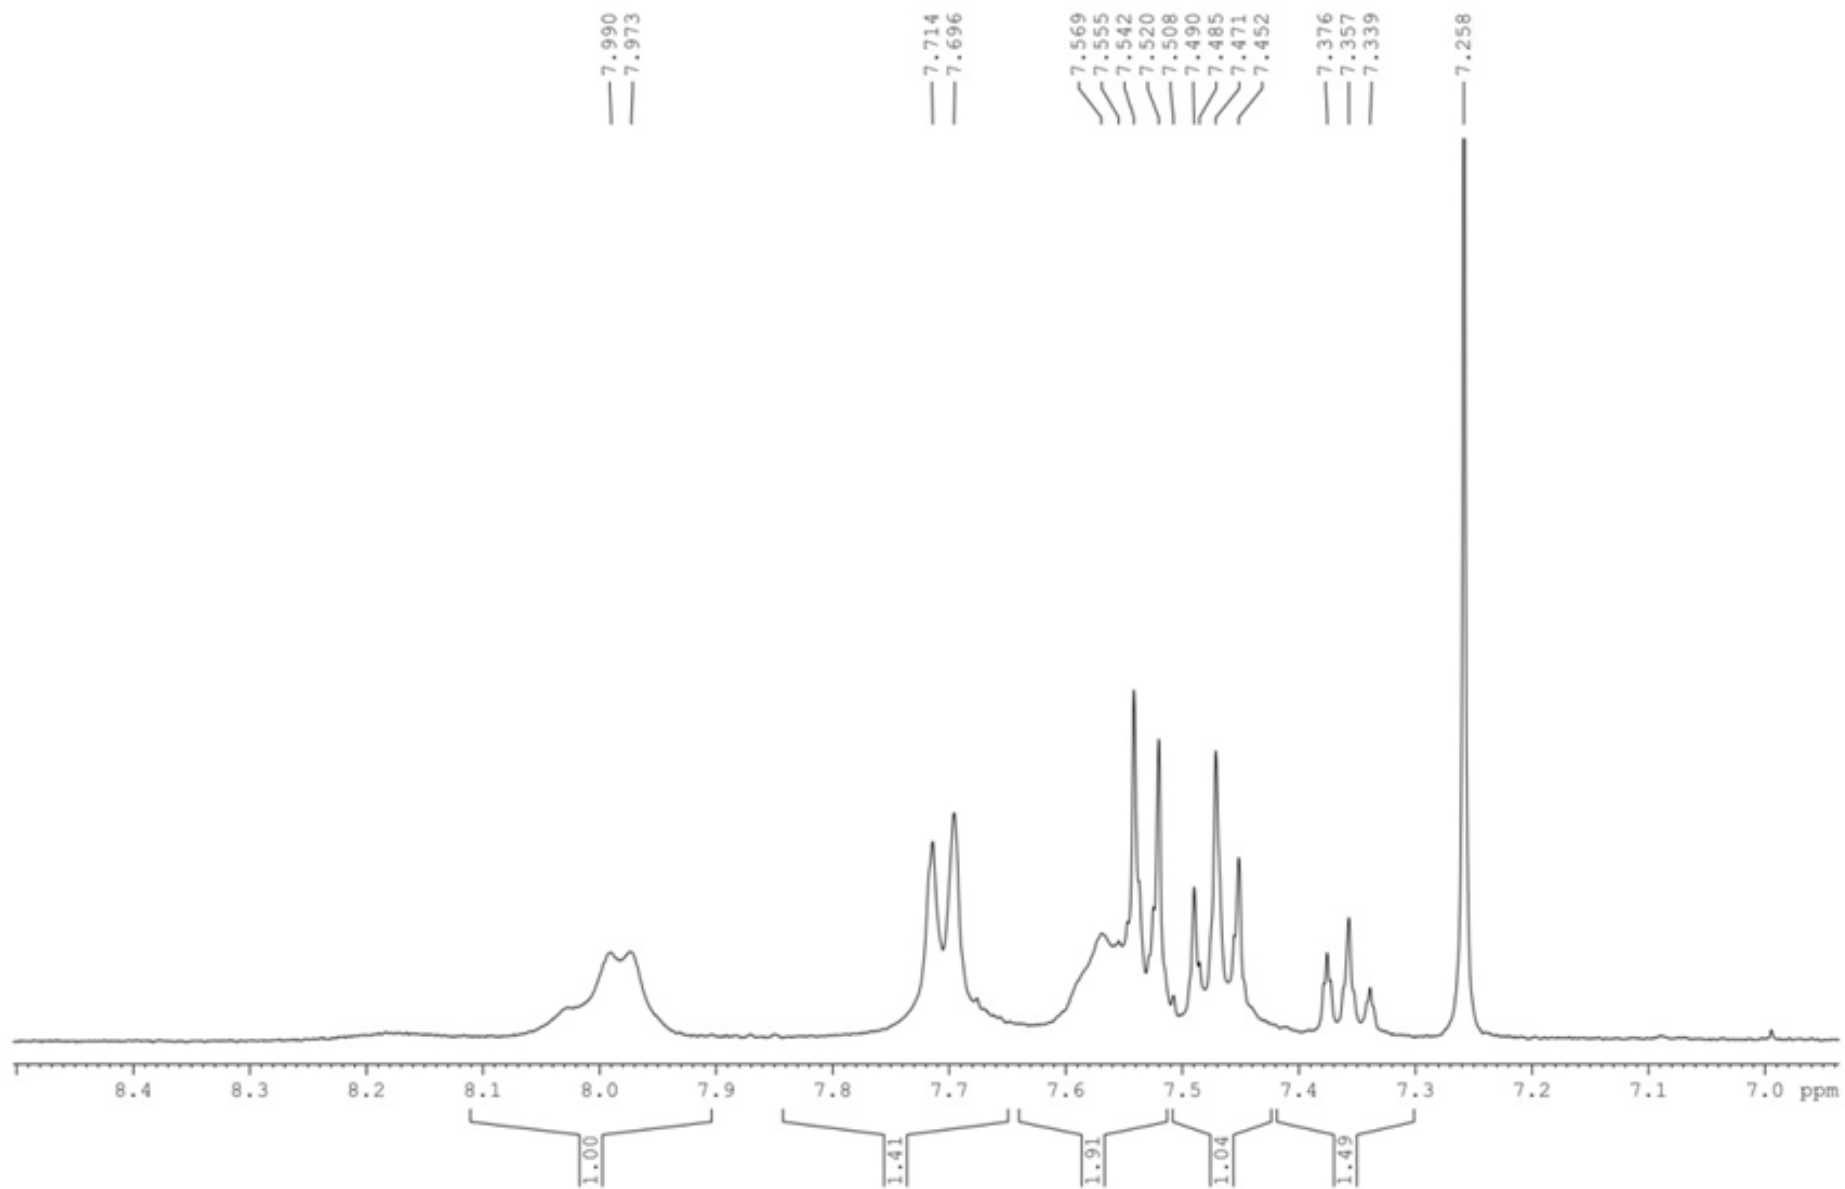

$^1\text{H}$  NMR spectra of compound **MH4** extended

MH4

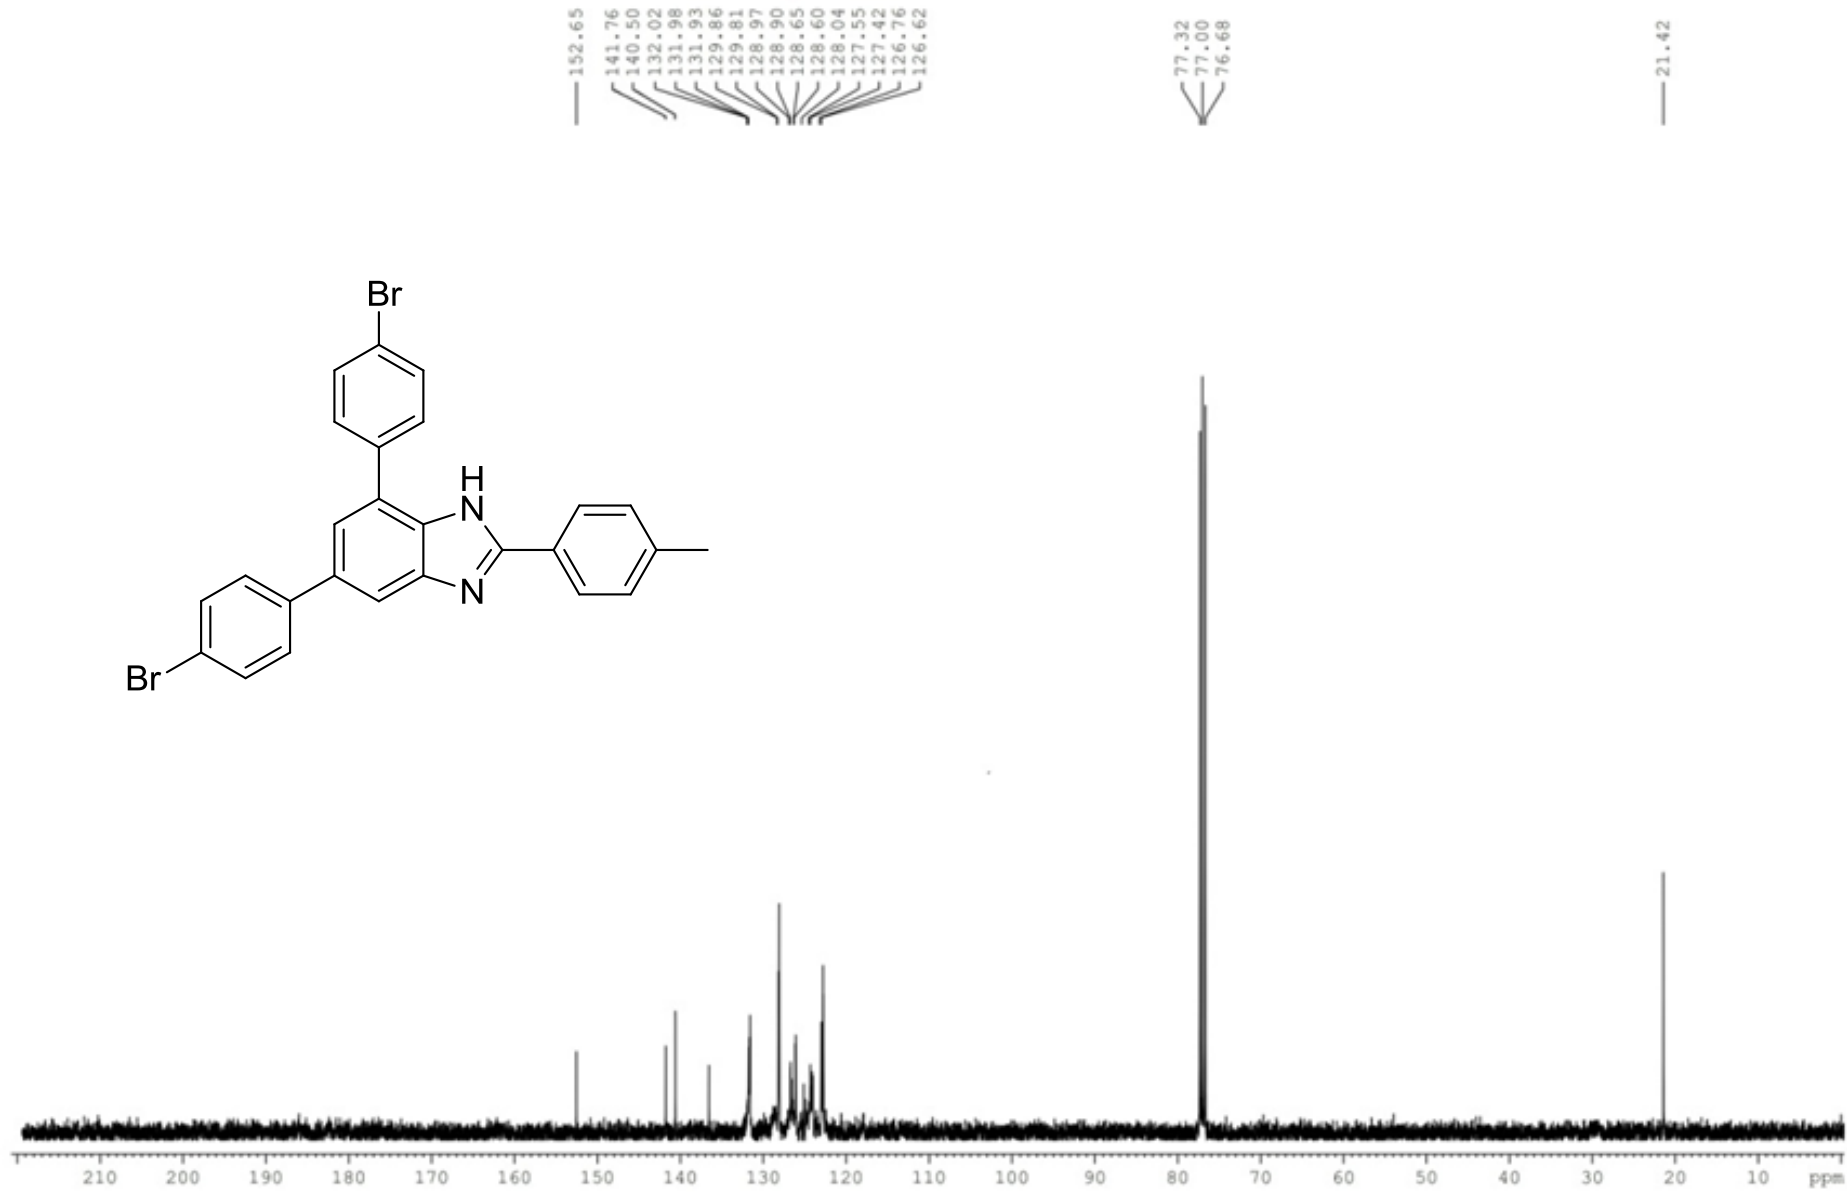

<sup>13</sup>C NMR Spectrum of compound **MH4**

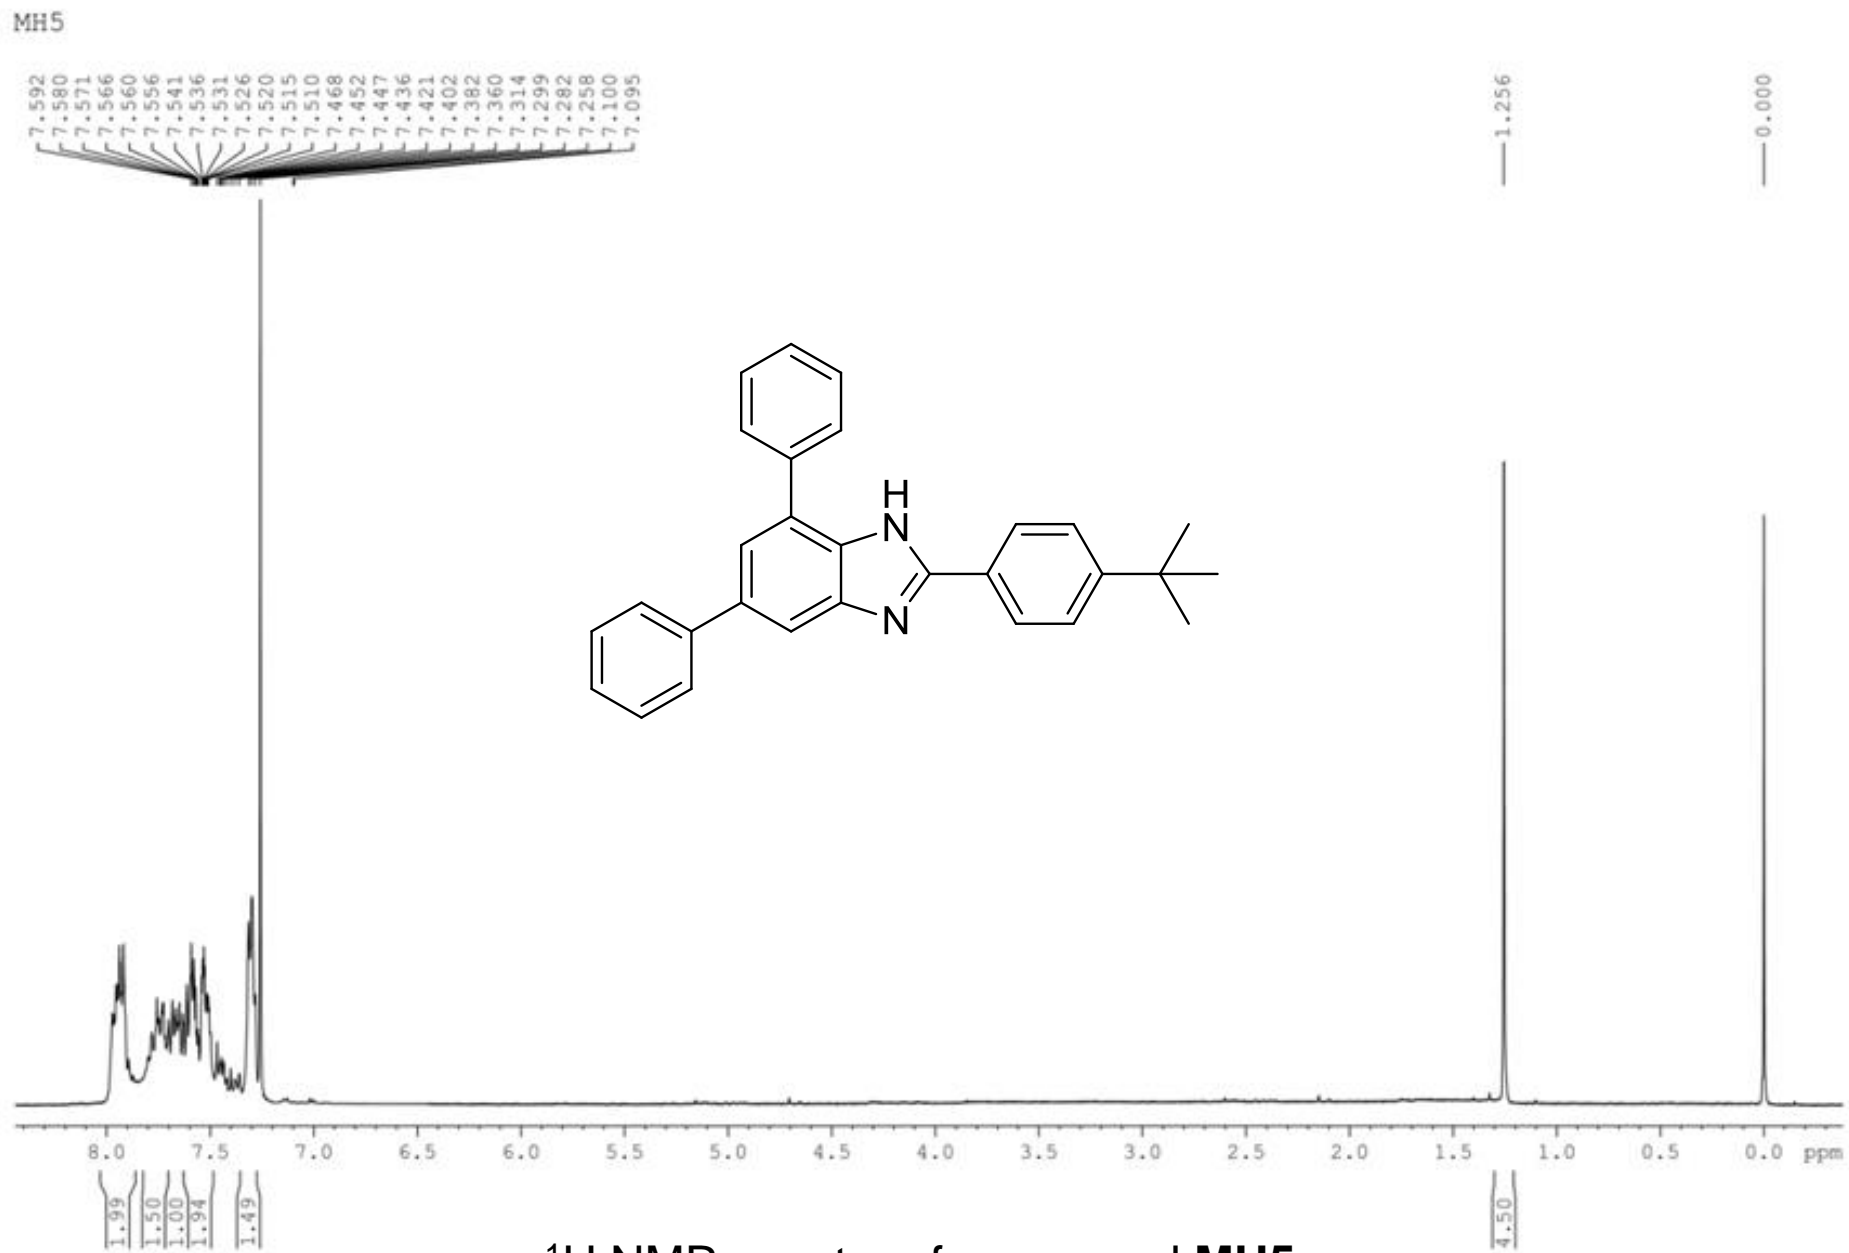

$^1\text{H}$  NMR spectra of compound **MH5**

MH5

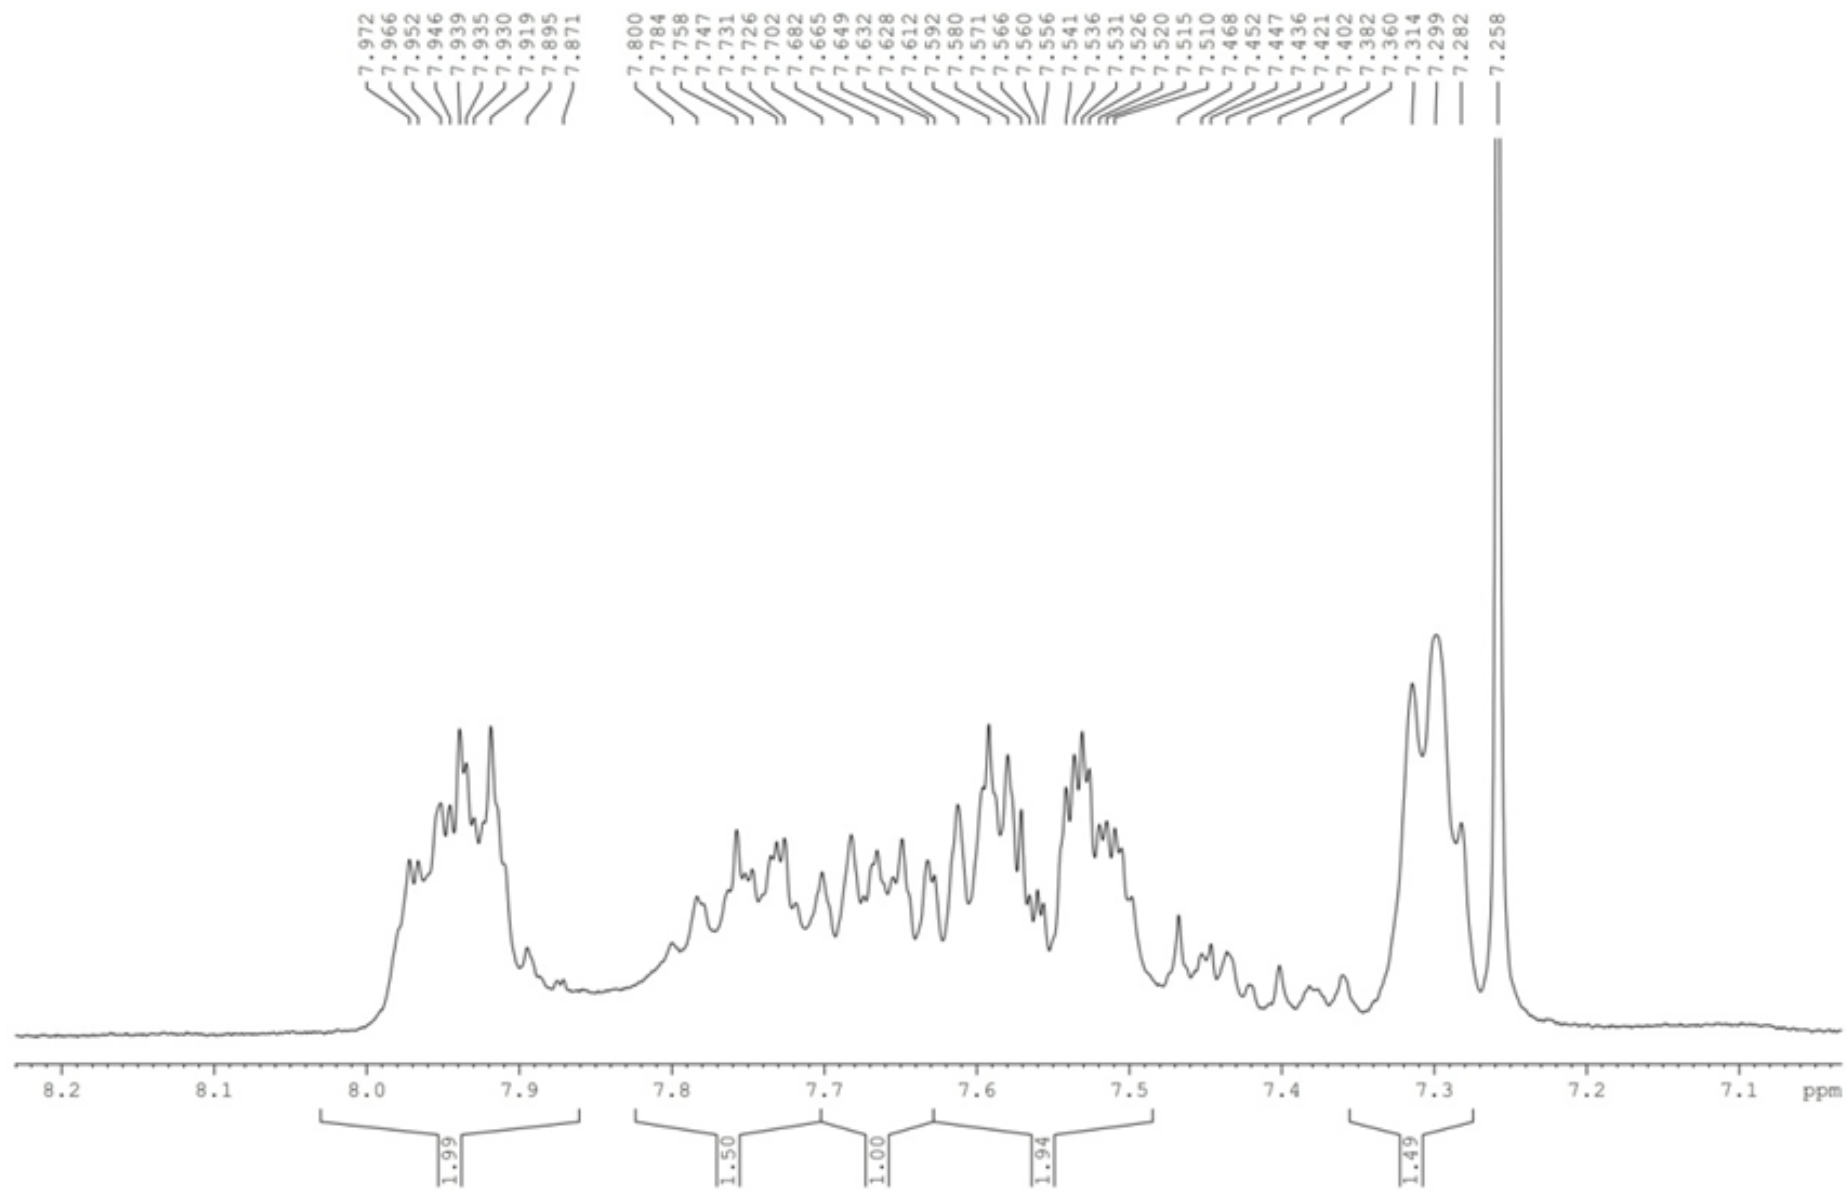

$^1\text{H}$  NMR spectra of compound **MH5** extended

MH5

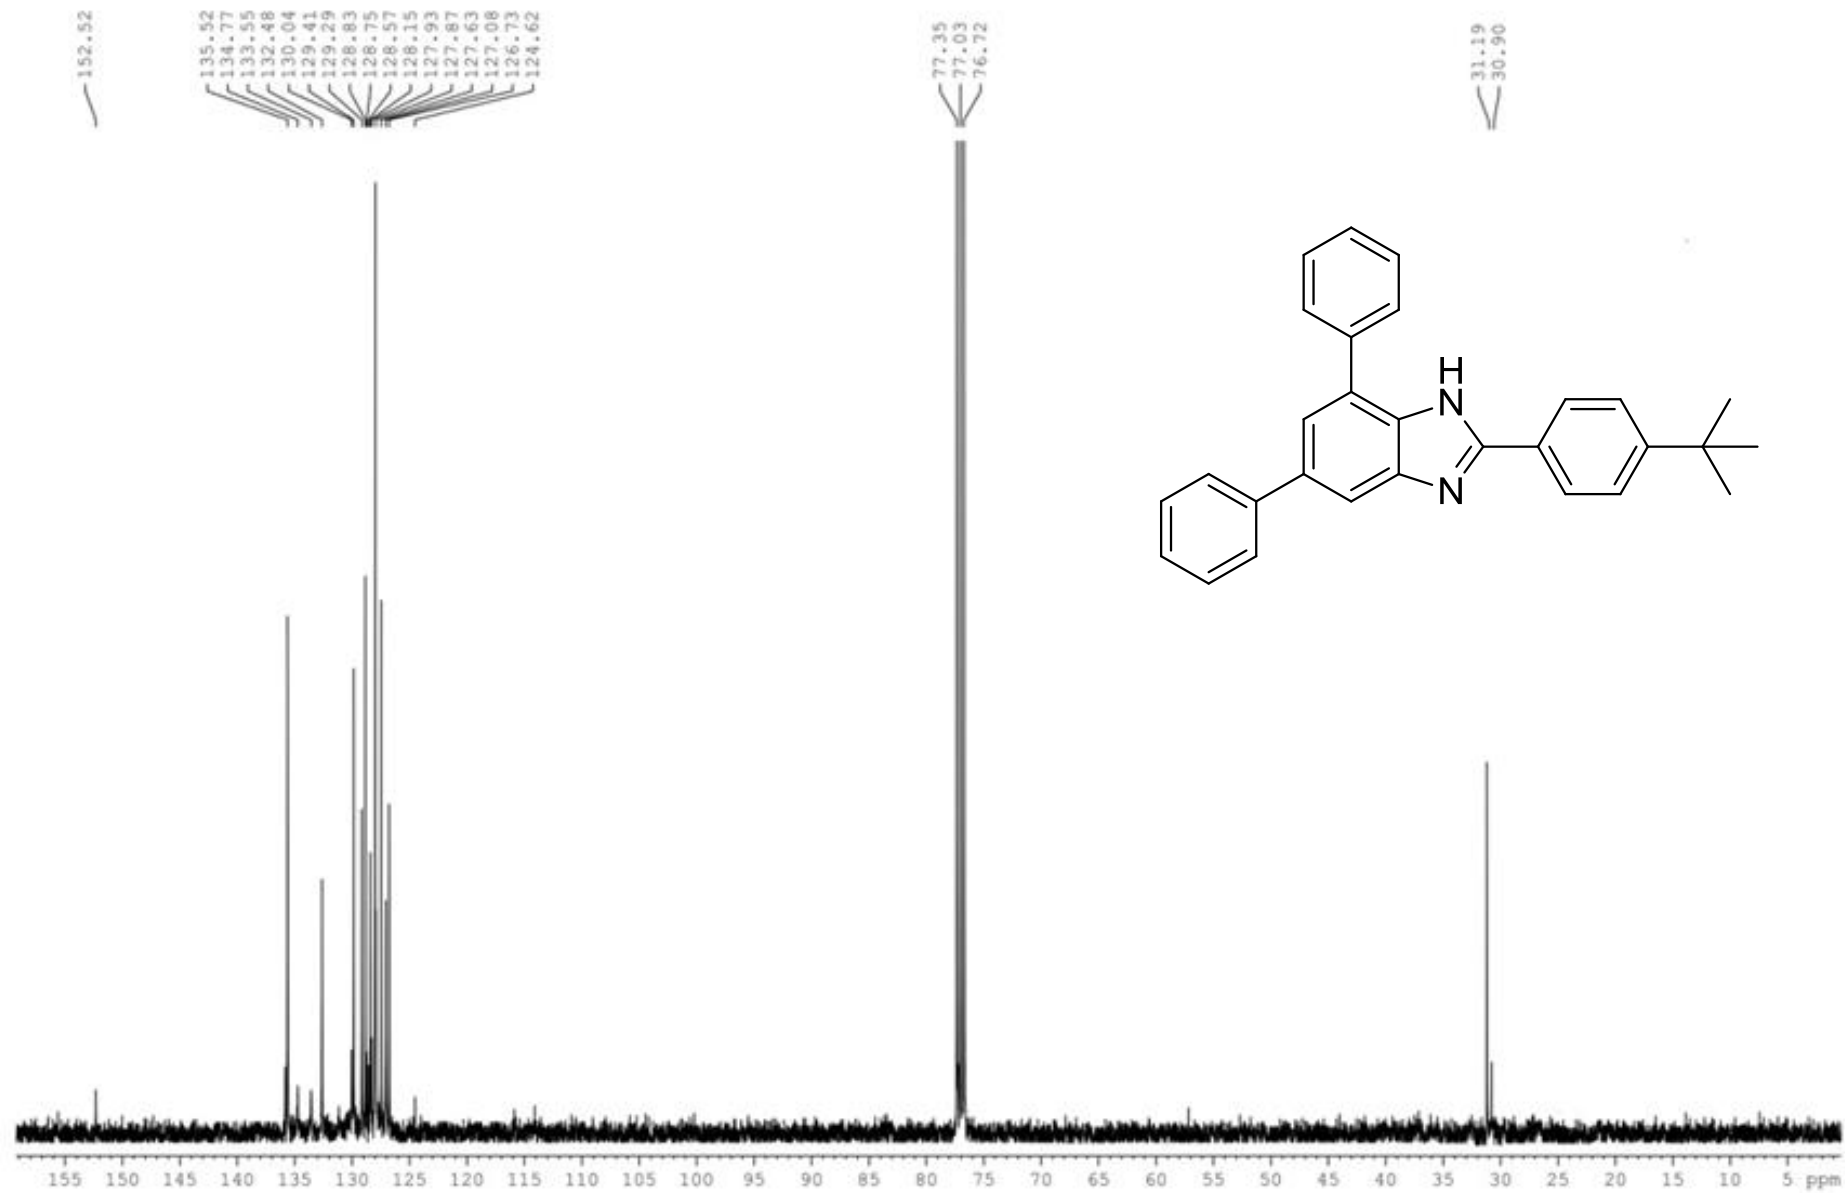

$^{13}\text{C}$  NMR Spectrum of compound **MH5**
